# Supplementary material for: Reconfiguration of nucleosome-depleted regions at distal regulatory elements accompanies DNA methylation of enhancers and insulators in cancer
Source: HighWire-hosted journal article supplement (doi:10.1101/gr.163485.113), 2014-06-10
Supplement: Supplemental_Figure_Legends.docx [file Supplemental_Figure_Legends.docx]

**SUPPLEMENTAL FIGURE LEGENDS**

***Supplementary Figure 1:* NOMe-seq reveals that patterns of nucleosome occupancy are largely unique to individual cell types.** (A-B) NDRs were called at increasing –log10 p-values (5-20) in all cell types. The number of NDRs (bars, left y-axis) and the distribution (filled circles, right y-axis) was determined at each cutoff. The –log10 p-value of 15 was used for all subsequent analyses. (C) NDRs were designated unique, or common to two, three or all four cell lines analyzed. (D) NDRs remain cell-type specific, irrespective of increasing p-value cutoffs. The percentage of NDRs is expressed as a proportion of the total at each cutoff. (E) Very few NDRs (<4%) are found in all four cell types, while the majority (~65%) are found in only one of the four cell types analyzed. HMEC, pink. MCF7, purple. Nucleosome depleted region (NDR), teal.

***Supplementary Figure 2:* Methods to detect accessible regions genome-wide have a different preference to GpC density.**(A) Overlap between the number of accessible regions determined by DNase-seq and FAIRE-seq as well as NDRs detected by NOMe-Seq are plotted as a Venn diagram. (B-D) GpC density is plotted as the percent of bins overlapping (B) DNase I and (C) FAIRE accessible regions and (D) NOMe-seq NDRs.

***Supplementary Figure 3:* Validation of ChromHMM classification of the epigenomes of cell lines.** (A) Heatmaps of average ChIP-seq enrichment signal observed for each mark in the 9 learned ChromHMM states. (B) Each ChromHMM state was integrated with RNA-seq data. The data are expressed as the mean RNA-seq signal (y-axis) on the positive strand (scale 0 to 15; solid line) and on the negative strand (scale 0 to 15; dashed line). The distance from the center of the ChromHMM state is shown (x-axis; bp). NDR, nucleosome depleted region; bp, base pair.

***Supplementary Figure 4:* NOMe-seq reveals that nucleosomes are organized throughout the genome, at Nucleosome Depleted Regions (NDRs) and *facultative*NDRs (*f*NDRs).** (A-F) Each genomic feature (NDR, CTCF binding site or DNase I hypersensitivity site) was called as “present” (solid lines) or “absent” (broken lines) in PrEC (upper panels) or PC3 (lower panels). Nucleosome occupancy and endogenous methylation (CpG) were mapped +/- 1000bp from the center (“0”) of each NDR, DNase I hypersensitive site and CTCF site. (A, B) NOMe-seq demonstrates that nucleosomes are organized on either side of a NDR (solid teal lines) and across the genome, even at less pronounced or absent NDRs (broken teal line). DNA methylation is phased alongside nucleosomes (black lines) regardless of nucleosome occupancy; however, DNA methylation is typically low (~20%) within NDRs (solid black line). (C, D). DNase I hypersensitive sites are characterized by organized nucleosomes (solid teal lines) while DNA methylation (solid black lines) is low at the center then phased and increasing with distance from the center of the DNase I site (solid black line) similar to patterns observed around NDRs. (E, F). CTCF is associated with nucleosome patterns (solid teal lines) and phased peaks of DNA methylation (solid black lines) between the nucleosomes. In the absence of CTCF, nucleosomes are not phased (broken teal lines) and a continuous high level of DNA methylation is observed (~60%). (G-J) Nucleosome occupancy and endogenous methylation (CpG) were mapped +/- 1000bp from the center (“0”) of each NDR in all four cells types at a threshold of –log10 p-value =3 to demonstrate that phasing still occurs when NDRs are completely absent (broken teal lines).

***Supplementary Figure 5*: Multiple transcription factors are associated weakly phased or unorganized nucleosomes.** (A-B) Nucleosome occupancy (teal lines) and endogenous methylation (CpG; black lines) were mapped +/- 1000bp from the center (“0”) of each transcription factor binding site and were determined to be (A) “weakly phased” or (B) unphased in MCF7 cells.

***Supplementary Figure 6*: NOMe-seq metrics associated with genomic GpC density.** (A) Distribution of GpC density within 100bp bins, (B) NDRs detected relative to GpC density and (C) sequencing coverage relative to GpC density were calculated.
